# Supplementary material
Source: publisher figshare collection journal article supplement (https://acs.figshare.com/ndownloader/files/22527782)
Supplement: Supplementary file 1 [file 22527782]

## Supporting Information

# Crumpled Graphene Decorated with Manganese Ferrite Nanoparticles for Hydrogen Peroxide Sensing and Electrochemical Supercapacitors

Larissa H. Nonaka<sup>†</sup>; Thiago S.D. Almeida<sup>†</sup>; Caroline B. Aquino<sup>‡</sup>; Sergio H. Domingues<sup>‡</sup>; Rodrigo V. Salvatierra<sup>§</sup>; Victor H.R. Souza<sup>†\*</sup>

<sup>†</sup>Faculty of Exact Science and Technology, Universidade Federal da Grande Dourados, Dourados, MS, Brazil

<sup>‡</sup>MackGraphe – Graphene and Nanomaterial Research Center, Mackenzie Presbyterian University, 01302-907 São Paulo, Brazil.

<sup>§</sup>Department of Chemistry, The NanoCarbon Center, and Department of Materials Science and NanoEngineering, Rice University, 6100 Main Street, Houston, Texas 77005, United States

**(A)**

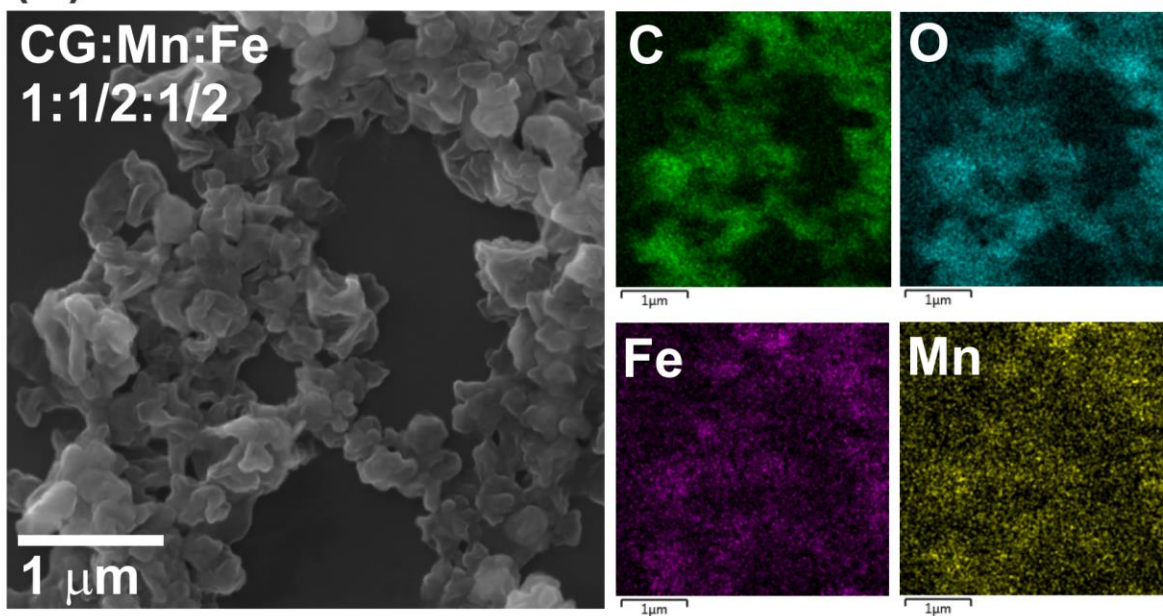

**(B)**

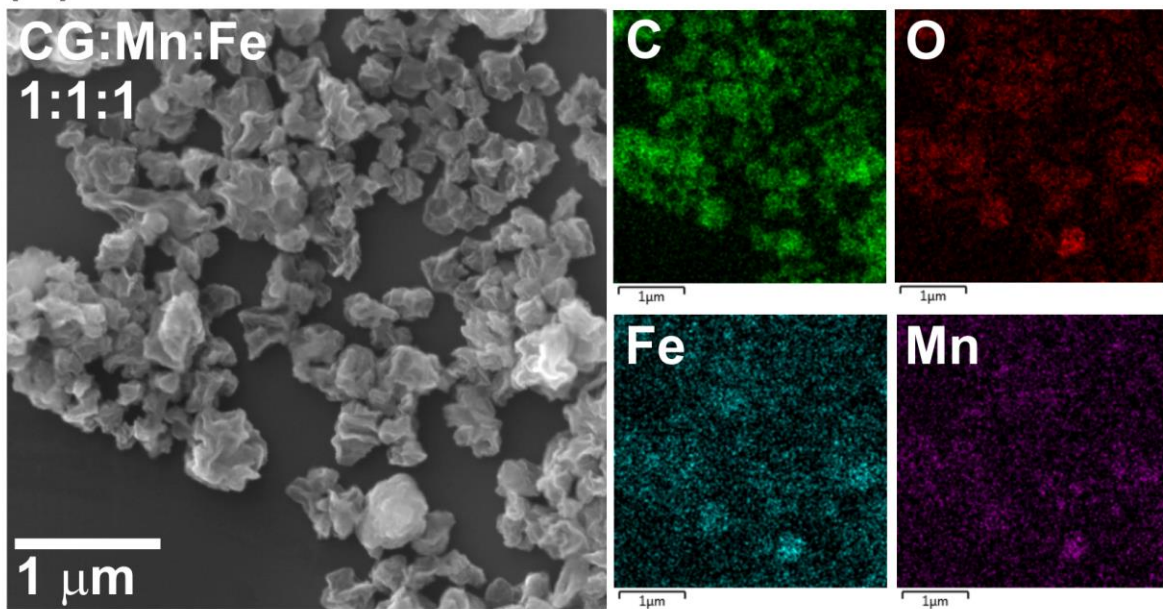

**Figure S1 - SEM and EDS mapping images of the samples CG:Mn:Fe (A) 1:<sup>1</sup>/<sub>2</sub>:<sup>1</sup>/<sub>2</sub>, and (B) 1:1:1.**

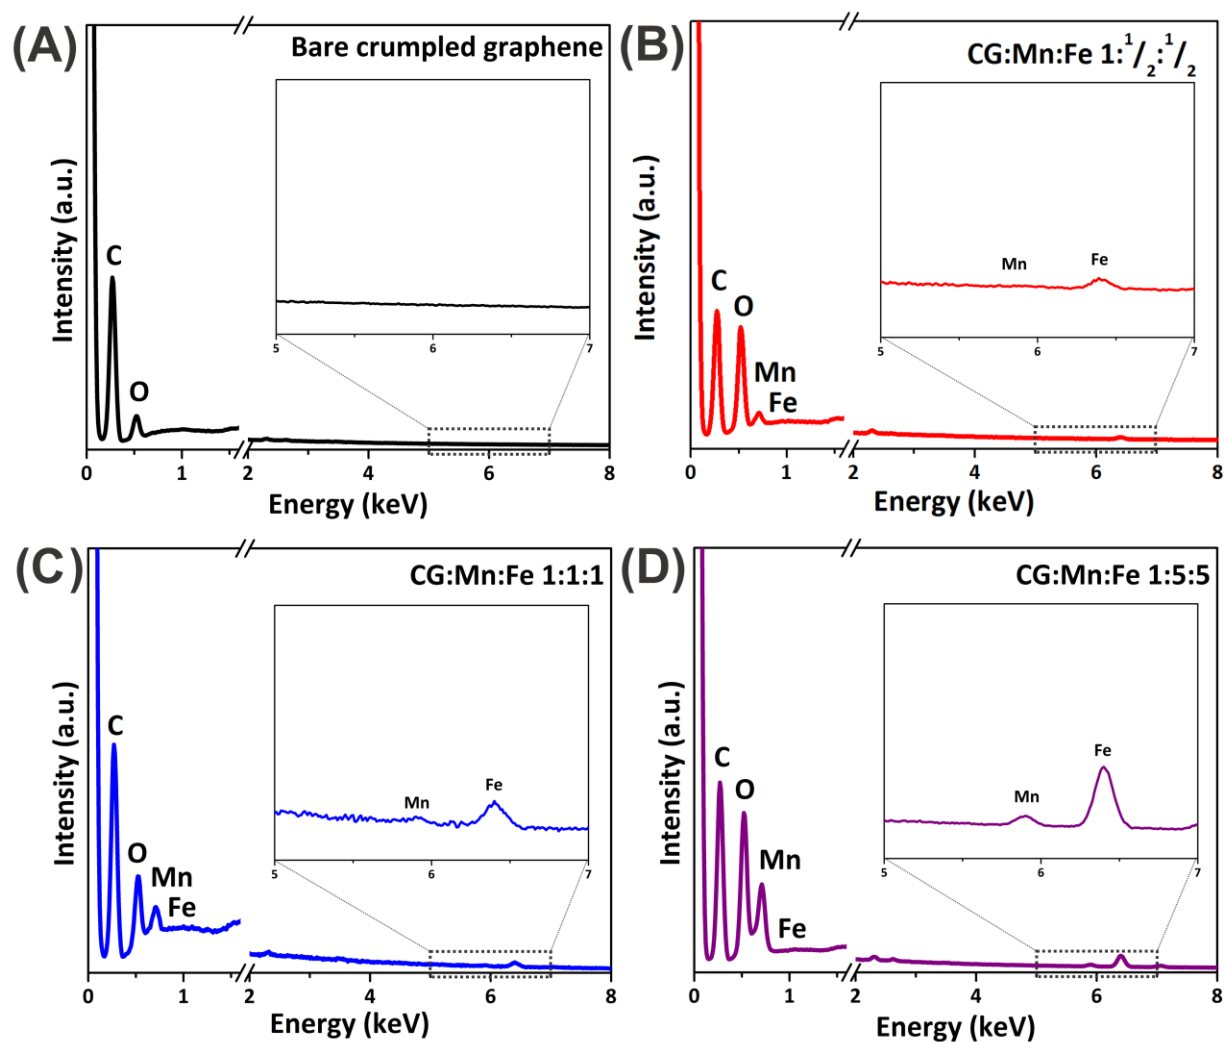

Figure S2 – EDS spectra and inset region from 5 to 7 keV for bare CG (A) and composites 1:1/2:1/2 (B), 1:1:1 (C), and 1:5:5 (D). The region corresponding to the peak of silicon was removed from all spectra.

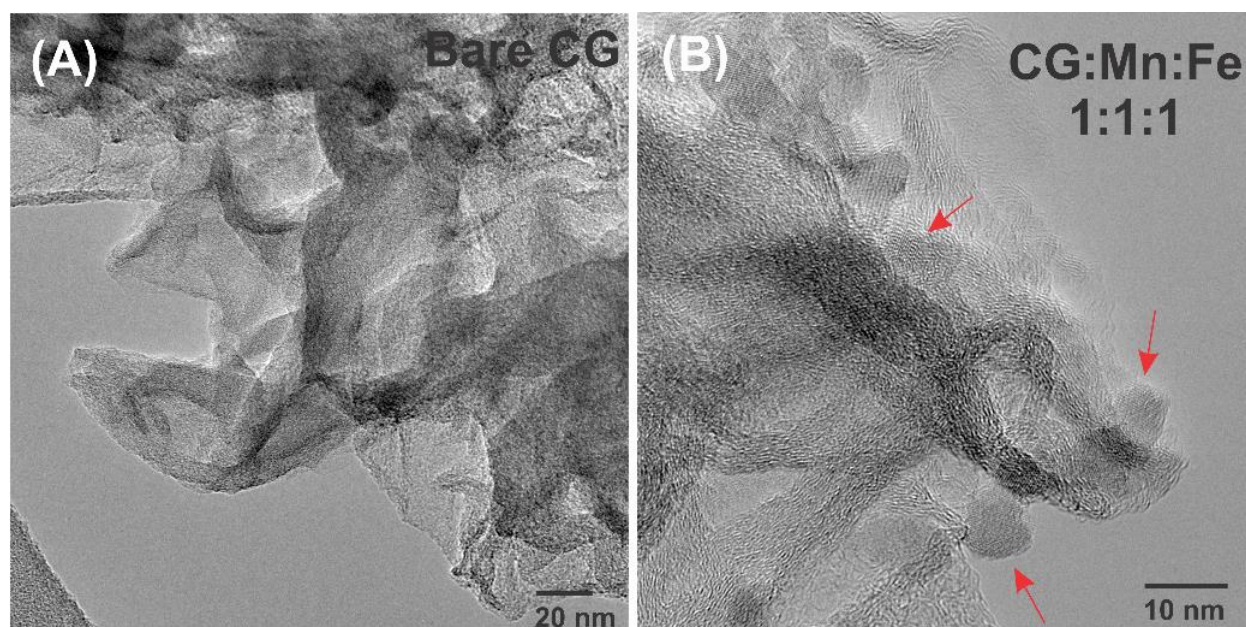

**Figure S3 – HRTEM images for (A) bare CG, and (B) CG:Mn:Fe 1:1:1.**

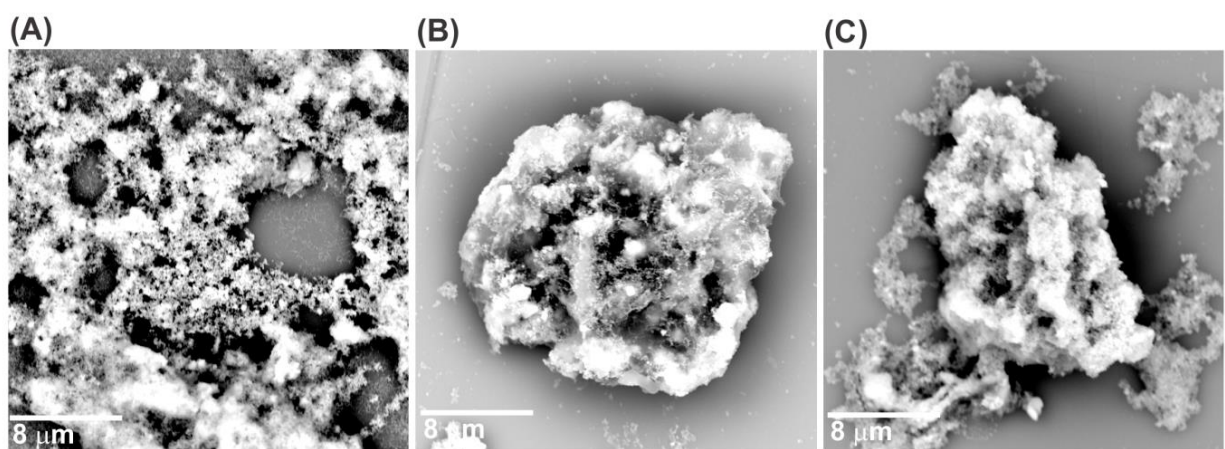

**Figure S4 - SEM images of (A) bare MnFe<sub>2</sub>O<sub>4</sub>, (B) flat rGO:MnFe<sub>2</sub>O<sub>4</sub> 1:1:1, and (C) flat rGO:MnFe<sub>2</sub>O<sub>4</sub> 1:5:5.**



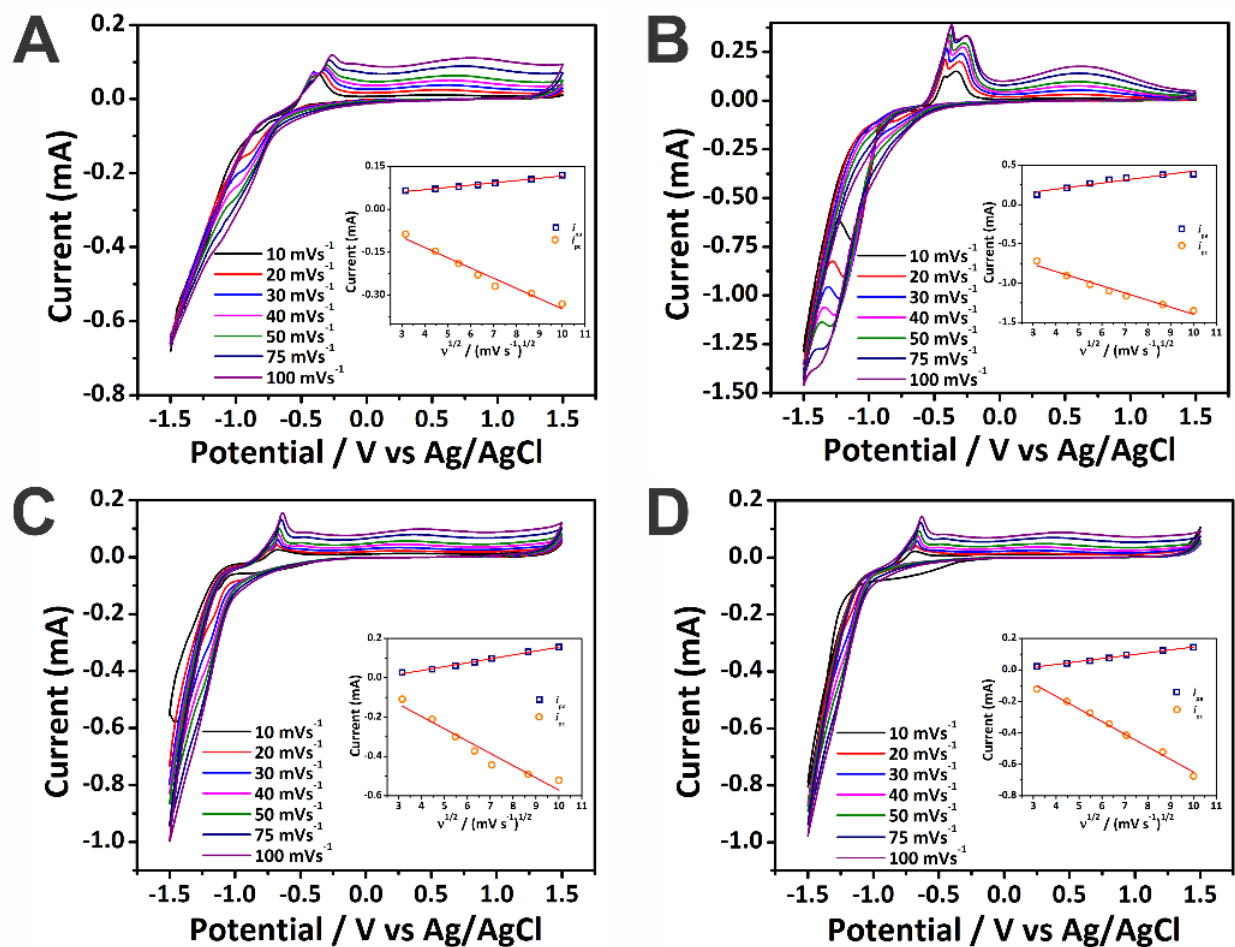

Figure S5 – CV curves at different scan rates, including the  $i$  vs.  $v^{1/2}$  curves at the inset for (A) bare CG; (B) CG:Mn:Fe 1:1/2:1/2, (C) 1:1:1, and (D) 1:5:5.

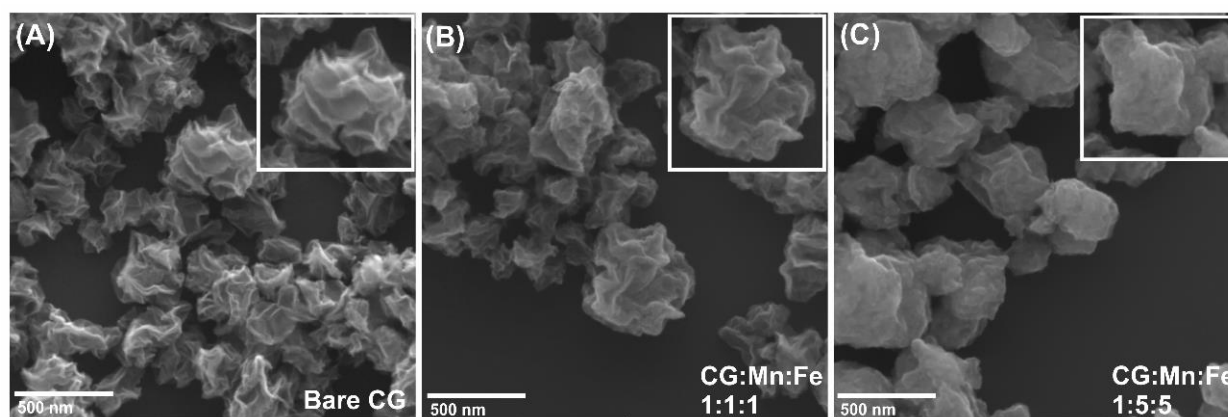

**Figure S6 – SEM images of (A) bare CG, and composites (B) 1:1:1, (C) 1:5:5, showing the evolution of the morphology increasing the manganese ferrite nanoparticles decorating CG surface.**

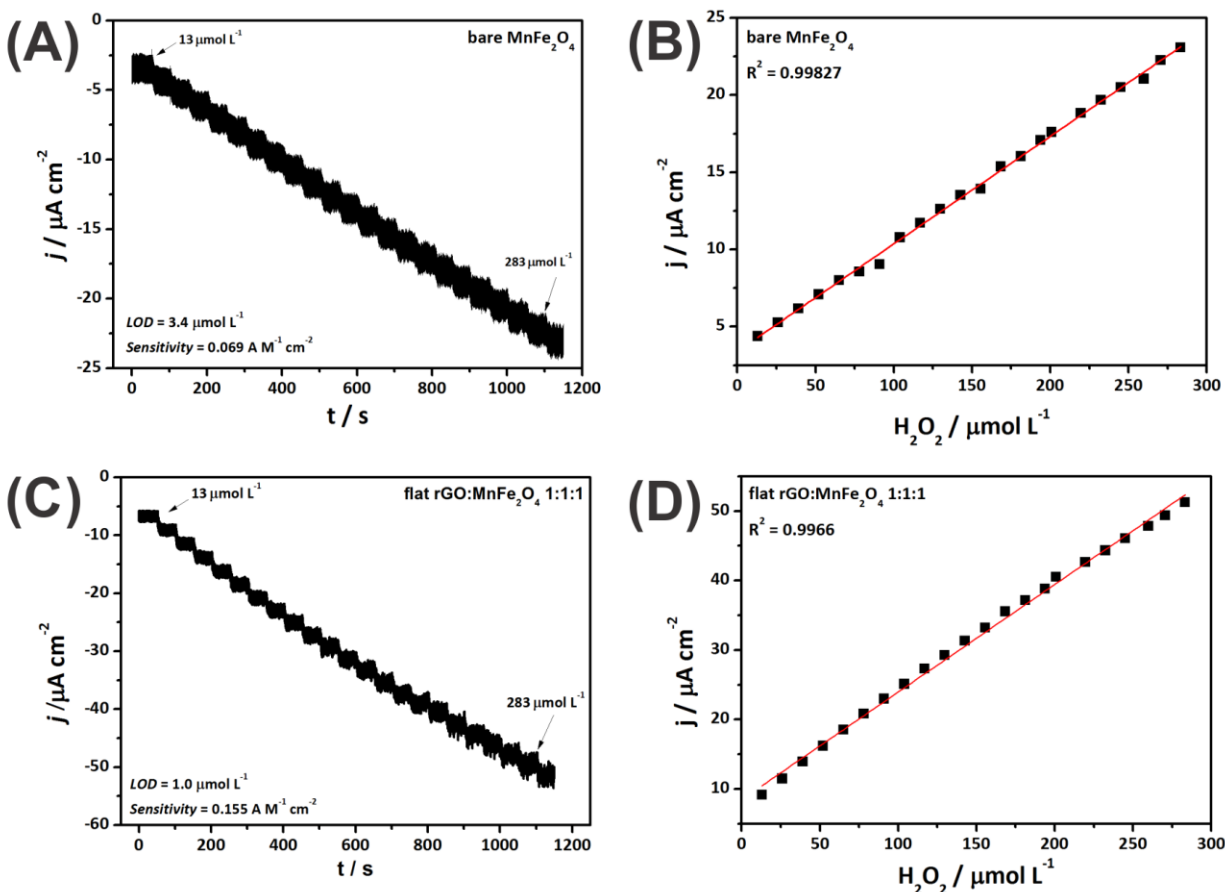

Figure S7 – (A) Chronoamperometric response of bare  $\text{MnFe}_2\text{O}_4$  for  $\text{H}_2\text{O}_2$  determination in a range from  $13$  to  $283 \mu\text{mol L}^{-1}$ , and (B) Analytical curve from the previous measure showing current density as a function of  $\text{H}_2\text{O}_2$  concentration. (C) Chronoamperometric response of flat  $\text{rGO:MnFe}_2\text{O}_4$  1:1:1 for  $\text{H}_2\text{O}_2$  determination in a range from  $13$  to  $283 \mu\text{mol L}^{-1}$ , and (D) Analytical curve from the previous measure showing current density as a function of  $\text{H}_2\text{O}_2$  concentration.



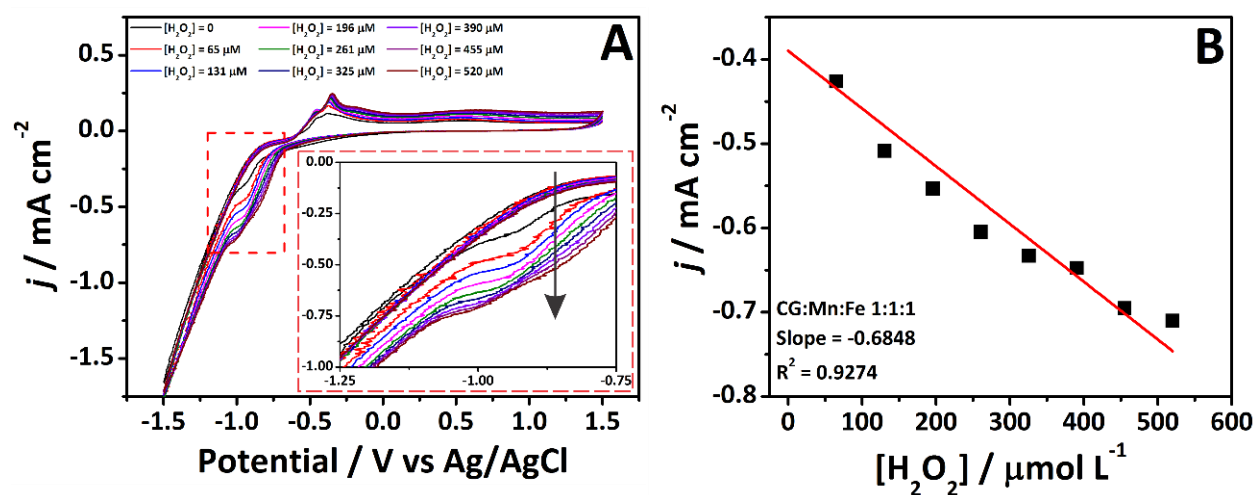

**Figure S8 –  $H_2O_2$  determination by CV measurements, including the evolution of cathodic peak with  $H_2O_2$  concentration in the inset (A), and analytical curve using current density in function of  $H_2O_2$  concentration (B).**

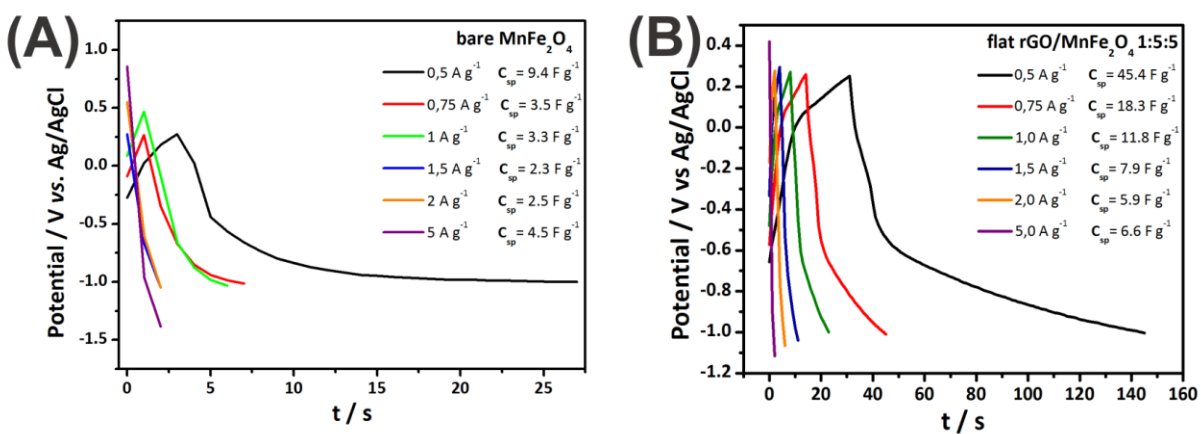

**Figure S9 - Charge/discharge curves (3<sup>rd</sup> cycle) at different current densities for (A) bare  $\text{MnFe}_2\text{O}_4$ , and (B) flat rGO: $\text{MnFe}_2\text{O}_4$  1:5:5.**

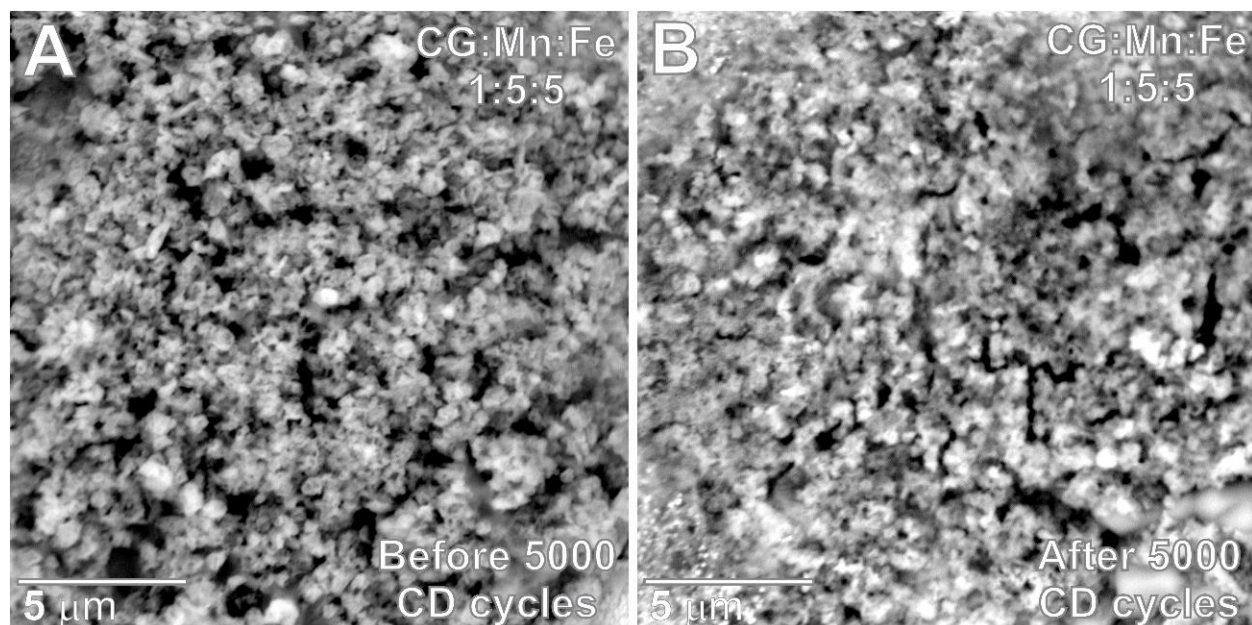

**S10 – SEM images of CG:Mn:Fe 1:5:5 before (A) and after (B) 5000 charge/discharge cycles.**

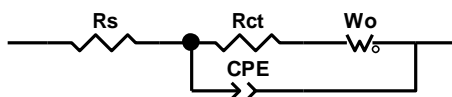

**Figure S11 – Randles equivalent circuit used in this work.**

**Table S1 - Analytical parameters of the different materials produced in this work for  $H_2O_2$  determination.**

| Sample                                                       | Limit of detection ( $\mu\text{mol L}^{-1}$ ) | Sensitivity ( $\text{A M}^{-1} \text{cm}^{-2}$ ) |
|--------------------------------------------------------------|-----------------------------------------------|--------------------------------------------------|
| <b>Bare CG</b>                                               | 3.51                                          | 0.04523                                          |
| <b>1:<sup>1</sup>/<sub>2</sub>:<sup>1</sup>/<sub>2</sub></b> | 2.74                                          | 0.05802                                          |
| <b>1:1:1</b>                                                 | 1.63                                          | 0.09745                                          |
| <b>1:5:5</b>                                                 | 2.50                                          | 0.06343                                          |

**TABLE S2 - Comparison of Coulombic efficiency\* (%) and cycle life of MnFe<sub>2</sub>O<sub>4</sub>-based capacitors.**

| Material                                                                                                 | CE% at current density (mA cm <sup>-2</sup> )<br>+ aqueous electrolyte                                                                                                                                                         | Completed cycles                                 | Reference |
|----------------------------------------------------------------------------------------------------------|--------------------------------------------------------------------------------------------------------------------------------------------------------------------------------------------------------------------------------|--------------------------------------------------|-----------|
| <b>MnFe<sub>2</sub>O<sub>4</sub> /graphene</b>                                                           | ~ 300% (0.3 A g <sup>-1</sup> ) – 3 -electrode<br>~ 130% (0.3 A g <sup>-1</sup> ) – 3-electrode<br>~ 50% (0.5 A g <sup>-1</sup> ) – 2-electrode<br>Electrolyte: PVA/H <sub>2</sub> SO <sub>4</sub>                             | 1000 to 5000 cycles<br>(at 5 A g <sup>-1</sup> ) | [9]       |
| <b>MnFe<sub>2</sub>O<sub>4</sub>/ polyaniline /graphene</b><br>*polyaniline is electro-chemically active | ~ 105 % (0.2 A g <sup>-1</sup> ) – 3-electrode<br>Electrolyte: 1 M KOH                                                                                                                                                         | 5000 cycles<br>(2 A g <sup>-1</sup> )            | [5]       |
| <b>Cu-doped MnFe<sub>2</sub>O<sub>4</sub>/ graphene</b>                                                  | N/A                                                                                                                                                                                                                            | 1000 cycles<br>(CV)                              | [8]       |
| <b>MnFe<sub>2</sub>O<sub>4</sub> NPs</b>                                                                 | ~ 52% (0.2 A g <sup>-1</sup> ) – 2-electrode<br>~ 81% (0.4 A g <sup>-1</sup> ) – 2-electrode<br>Electrolyte: 3.5 M KOH                                                                                                         | 10000 cycles<br>(3 A g <sup>-1</sup> )           | [6]       |
| <b>MnFe<sub>2</sub>O<sub>4</sub> NPs</b>                                                                 | ~ 50% (0.2 A g <sup>-1</sup> ) (2 M Na <sub>2</sub> SO <sub>4</sub> )<br>~ 93% (0.2 A g <sup>-1</sup> ) (2 M KOH)<br>~ 99% (0.2 A g <sup>-1</sup> ) (2 M LiOH)<br>~ 99% (0.2 A g <sup>-1</sup> ) (2 M NaOH)<br>All 2-electrode | N/A                                              | [40]      |
| <b>Crumpled graphene with MnFe<sub>2</sub>O<sub>4</sub> NPs</b>                                          | ~ 275% (0.5 A g <sup>-1</sup> ) – 3-electrode<br>~ 125% (0.7 A g <sup>-1</sup> ) – 3-electrode<br>Electrolyte: 0.05M KCl                                                                                                       | 5000 cycles<br>(2 A g <sup>-1</sup> )            | This work |

\*CE was calculated as ratio of discharge to charge capacity in the galvanostatic measurement.
